# Supplementary material
Source: PubMed Central journal article supplement (PMC7429296)
Supplement: NIHMS1607567-supplement-1.pdf [file NIHMS1607567-supplement-1.pdf]

## Supplementary Information

### Controlled Release of Odontogenic Exosomes from a Biodegradable Vehicle Mediates Dentinogenesis as a Novel Biomimetic Pulp Capping Therapy

W. Benton Swanson, Ting Gong, Zhen Zhang, Miranda Eberle, David Niemann, Ruonan Dong, Kunal J. Rambhia, Peter X. Ma

**Table 1.** Primer sequences used for quantitative polymerase chain reaction evaluation of gene expression.

| <u>Gene</u>  | <u>Forward Sequence</u> | <u>Reverse Sequence</u> |
|--------------|-------------------------|-------------------------|
| Human GAPDH  | CCATGGAGAAGGCTGGG       | CAAAGTTGTCATGGATGACC    |
| Human DSPP   | GTGATAGAGGAAGGCAAGAG    | ATTCCAGCCCTCAATATTCC    |
| Human OCN    | CAAAGGTGCAGCCTTTGTGTC   | TCACAGTCCGGATTGAGCTCA   |
| Human BSP    | GCGAAGCAGAAGTGGATGAAA   | TGCCTCTGTGCTGTTGGTACTG  |
| Human VEGF   | CAAAAACGAAAGCGCAAGAAA   | GCGGGCACCAACGTACAC      |
| Mouse GAPDH  | AGGTCGGTGTGAACGGATTTG   | TGTAGACCATGTAGTTGAGGTCA |
| Mouse Runx2  | ATGCTTCATTCGCCTCACAAA   | GCACTCACTGACTCGGTTGG    |
| Mouse OCN    | GAACAGACAAGTCCCACACAG   | AGCAGAGTGAGCAGAAAGATG   |
| Mouse DSPP   | ATTCCGGTTCCCCAGTTAGTA   | CTGTTGCTAGTGGTGCTGTT    |
| Mouse Col1a1 | GCTCCTCTTAGGGGCCACT     | ATTGGGGACCCTTAGGCCAT    |

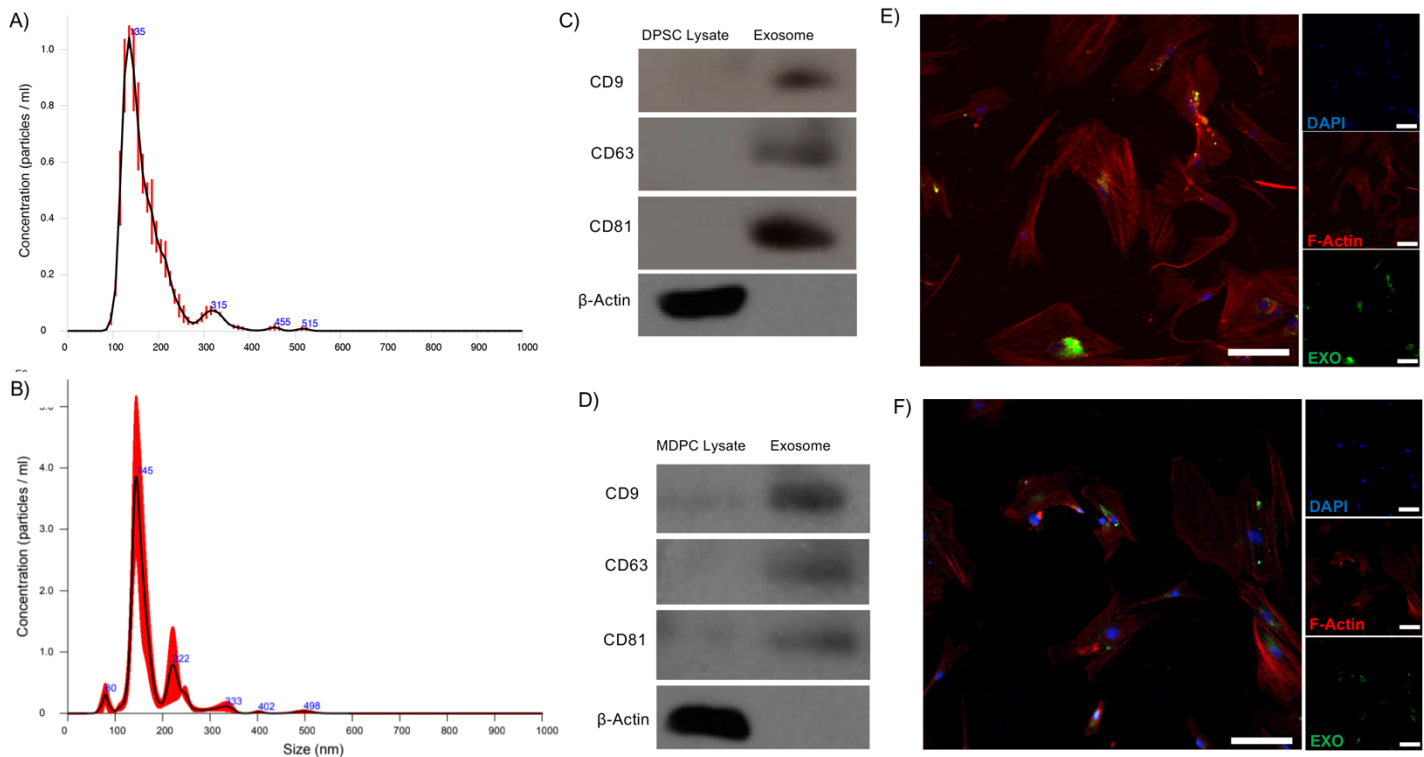

**Supplementary Figure 1.** Freshly isolated extracellular vesicles from primary hDPSCs and immortalized MDPC-23 cells are characterized by nanoparticle tracking analysis (A, B), demonstrating characteristic hydrodynamic diameter ( $d_{avg}$ =135 nm). Western blot analysis (C, D) of exosome-specific membrane surface markers (CD9, CD63, CD81) are abundantly present in the exosome isolate fractions but constitute only a small amount of the total cell lysate, when total protein concentrations are even, indicating that isolated extracellular vesicles are the product of the multivesicular body pathway. Freshly isolated extracellular vesicles from both cell types were labelled with DiO membrane dye, and their uptake by nascent hDPSCs was visualized by confocal microscopy (E, F; red = F-actin, blue = DAPI, green = DiO-labelled extracellular vesicles) 30 minutes after administration (scale = 15  $\mu$ m).

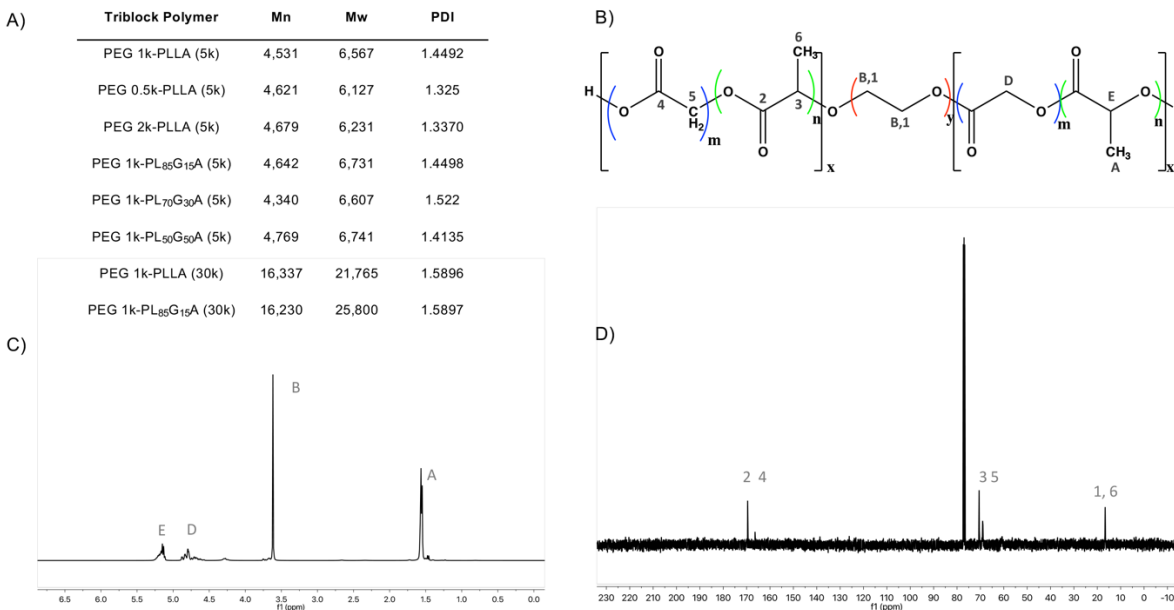

**Supplementary Figure 2.** Polymer characterization of PLGA-PEG-PLGA triblock copolymer. Molecular weight is determined by gel permeation chromatography (A); chemical composition and purity is assessed by  $^1\text{H}$  and  $^{13}\text{C}$  NMR (B, C, D).

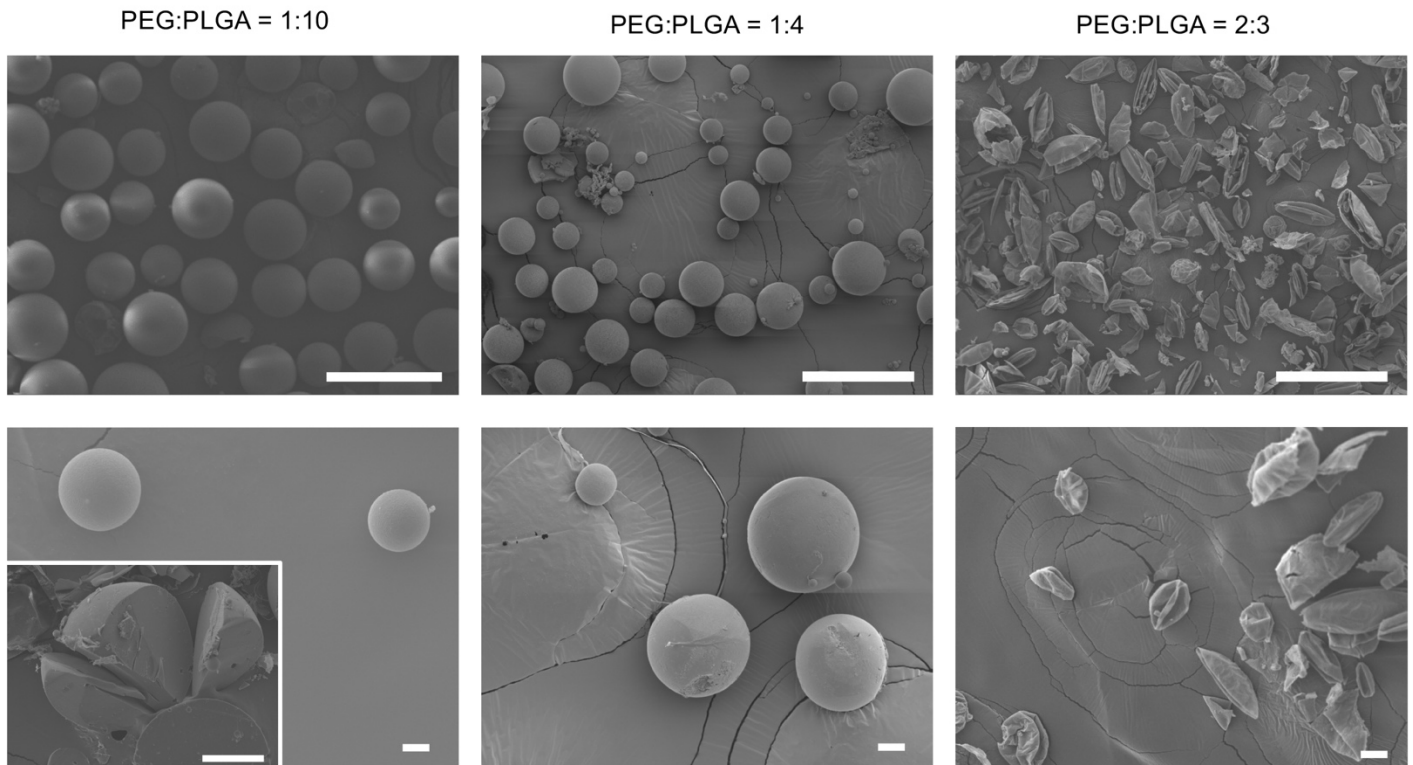

**Supplementary Figure 3.** The relative ratios of PEG and PLGA are critical design parameters of the PLGA-PEG-PLGA triblock copolymer. Top, scale = 100  $\mu\text{m}$ ; lower, scale = 10  $\mu\text{m}$ .

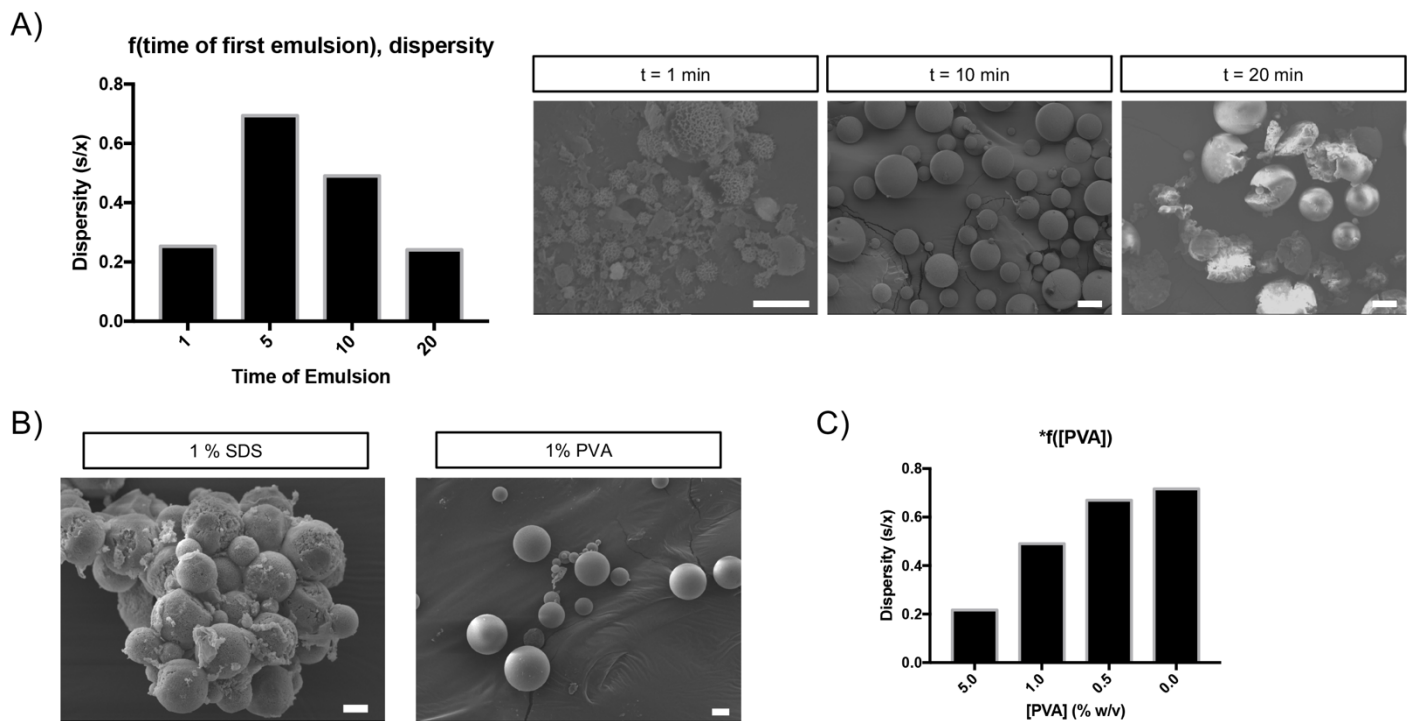

**Supplementary Figure 4.** EXO-MS morphology is a function of fabrication parameters. Particle dispersity decreases with increasing time of first emulsion, while average particle size increases with increasing time of first emulsion under the same second emulsion conditions (A). Polyvinyl alcohol (PVA) surfactant in the second emulsion results in smoother, more uniform particles than sodium dodecyl sulfate surfactant (B). Increasing PVA concentration leads to narrower particle dispersities, however too high of PVA concentration may render the particles cytotoxic and is difficult to remove completely by washing. Scale = 20  $\mu\text{m}$ .

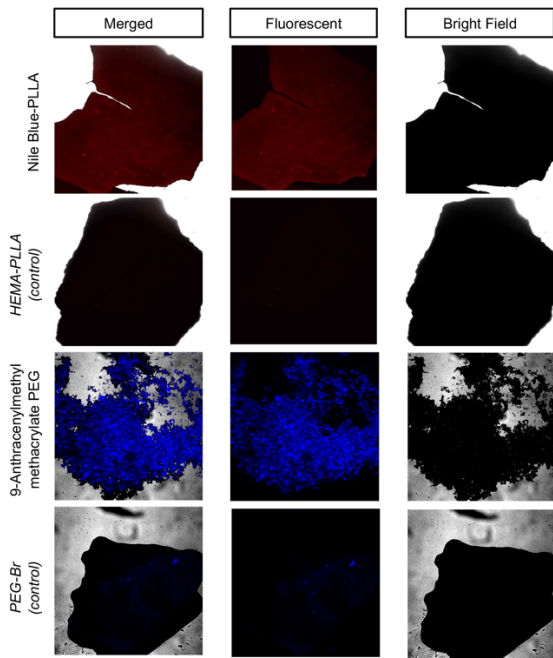

**Supplementary Figure 5.** Fluorescence of labelled polymer segments visualized by laser confocal microscopy, compared to nonfunctionalized precursor polymers.

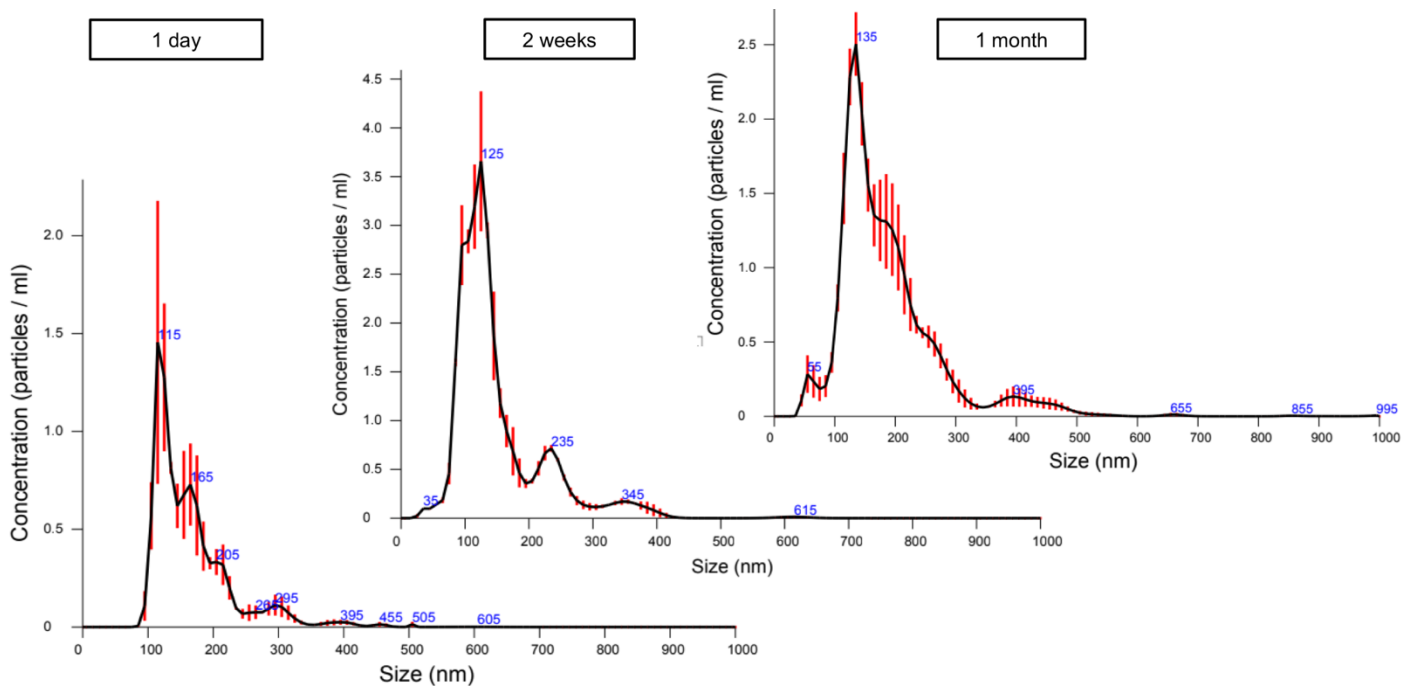

**Supplementary Figure 6.** Nanotracking analysis size distribution results at prescribed release time points: 1 day, 2 weeks, and 1 month. At each time point, DPSC-EXO maintain their characteristic size and dispersity, indicating that they are not physically modified as a result of encapsulation or release.

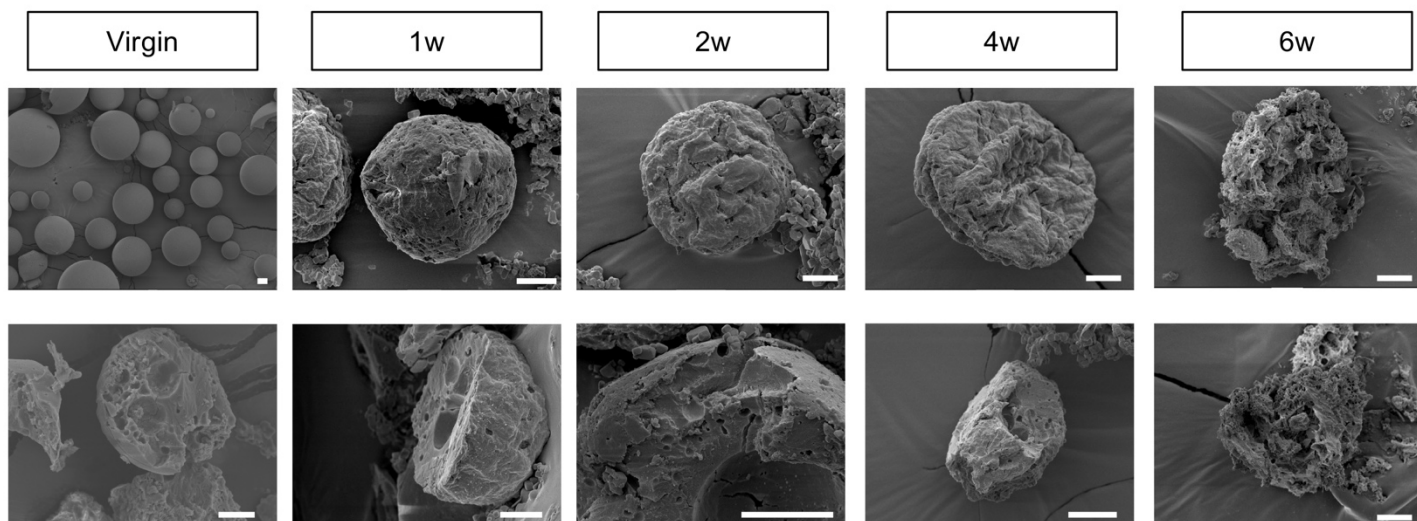

**Supplementary Figure 7.** SEM micrographs of EXO-MS at different degradation stages: virgin, 1 week, 2 weeks, 4 weeks, and 6 weeks. Images in the top row show changes to gross particle morphology; images in the bottom row show changes to the internal particle morphology throughout degradation. Scale = 10  $\mu\text{m}$ .

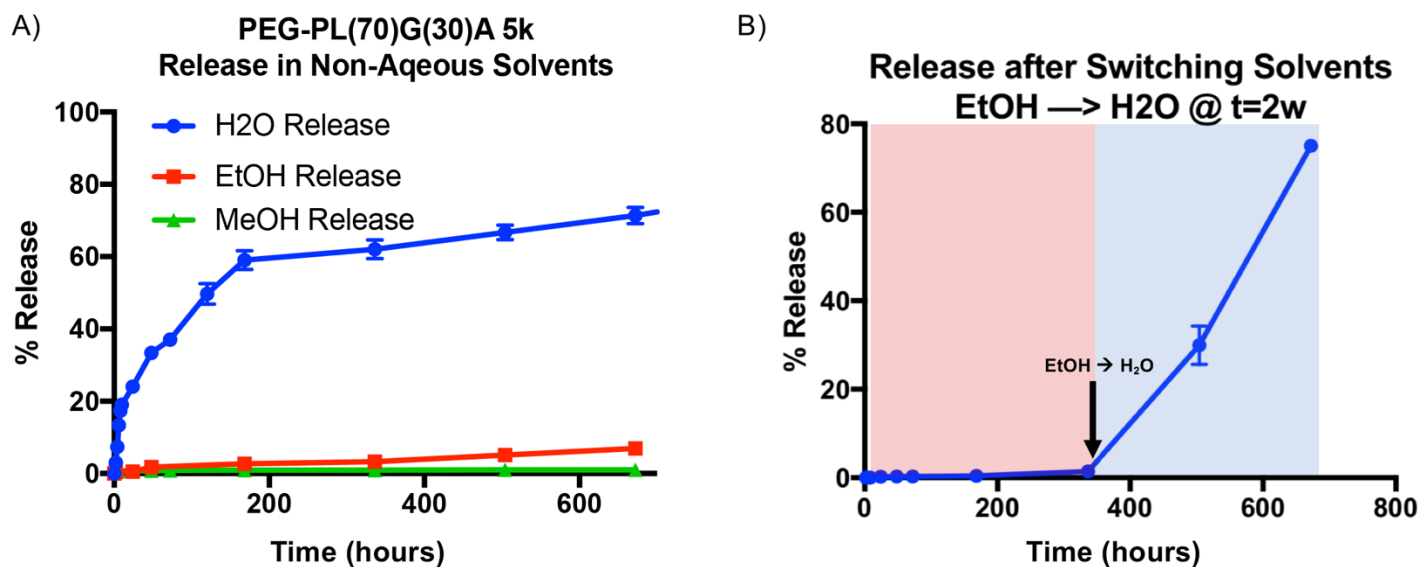

**Supplementary Figure 8.** EXO-MS were incubated in water, ethanol, and methanol, and the release of DPSC-EXO was measured by nanotracking analysis (A). Negligible amounts of DPSC-EXO were released in either methanol or ethanol, indicating that the solvent-wetting procedure to increase surface hydrophilicity did not cause significant amounts of DPSC-EXO load to be released before implantation. Particles incubated in ethanol for two weeks then switched to water began releasing DPSC-EXO immediately after the solvent change and resumed a normal release profile (B).

### RNA Extraction from Exosomes

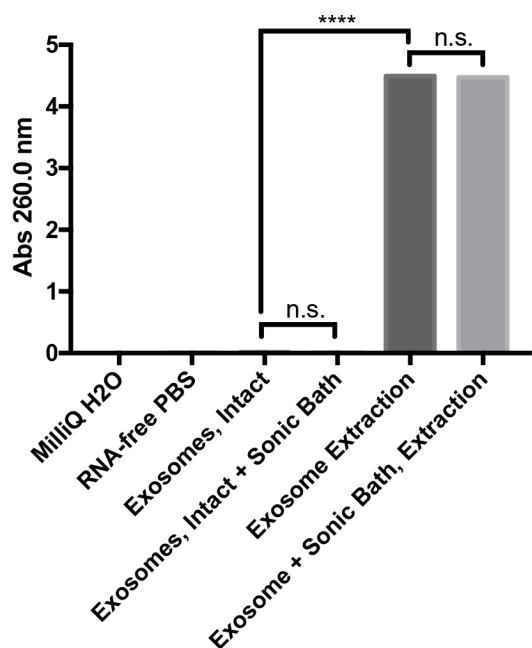

**Supplementary Figure 9.** Validation of phenol-based exosome RNA extraction method; RNA is only detected when the exosome membrane is lysed, while intact exosomes yield no detectible RNA.

### Copolymer Block Composition Effect on Exosome Release

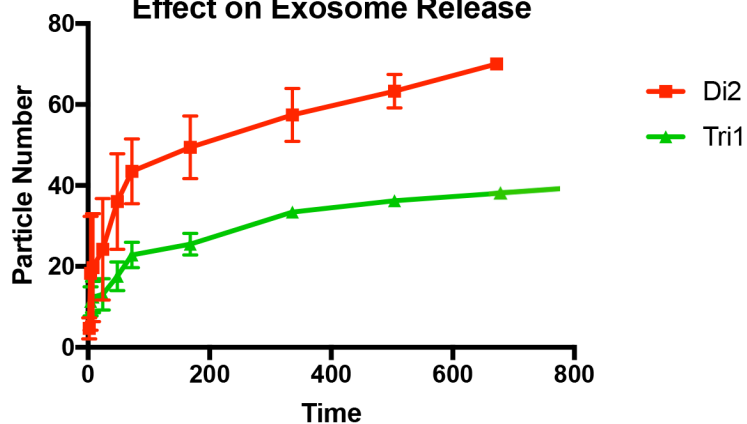

**Supplementary Figure 10.** EXO-MS fabrication parameters affect particle morphology and resulting release profile of DPSC-EXO (Tri1: PLGA-PEG-PLGA EXO-MS; Di2: PLGA-PEG EXO-MS).
